# Supplementary material for: DNA methylation mediates neural processing after odor learning in the honeybee
Source: PubMed Central journal article supplement (PMC5378914; doi:10.1038/srep43635), 2017-02-27
Supplement: srep43635-s1.pdf [file srep43635-s1.pdf]

# DNA methylation mediates neural processing after odor learning in the honeybee

Stephanie D. Biergans<sup>1,2\*</sup>, Charles Claudianos<sup>1,3</sup>, Judith Reinhard<sup>1</sup>, C. Giovanni Galizia<sup>2\*</sup>

<sup>1</sup> Queensland Brain Institute, The University of Queensland, Australia

<sup>2</sup> Neurobiologie, Universität Konstanz, Germany

<sup>3</sup> Monash Institute of Cognitive and Clinical Neuroscience, Faculty of Medicine, Nursing Health and Sciences, Monash University, Australia

**Table S1 Bees excluded from final analysis of Ca<sup>2+</sup> measurements due to: death during the 2 days between treatment and measurement, not showing AL signals or technical problems (i.e. no staining of the AL, strong movement or leakage of the preparation)**

| Treatment | Group    | Dead (%) | No signal (%) | Technical issue (%) | In sum (%) |
|-----------|----------|----------|---------------|---------------------|------------|
| RG108     | paired   | 56.4     | 20.5          | 12.0                | 88.9       |
|           | unpaired | 57.3     | 24.0          | 5.3                 | 86.7       |
| DMF       | paired   | 71.7     | 13.1          | 6.1                 | 90.9       |
|           | unpaired | 37.9     | 37.9          | 12.1                | 87.9       |

**Table S2 Bees excluded from final analysis of M17 measurements due to: death during the 2 days between treatment and measurement, not showing response to sugar after measurement or technical problems (i.e. electrode moving or dislocating)**

|       |          | Dead (%) | No sugar response (%) | Technical issue (%) | In sum (%) |
|-------|----------|----------|-----------------------|---------------------|------------|
| RG108 | paired   | 60.7     | 3.6                   | 0                   | 64.3       |
|       | unpaired | 61.9     | 2.4                   | 0                   | 64.3       |
| DMF   | paired   | 46.3     | 13.4                  | 1.5                 | 59.7       |
|       | unpaired | 73.1     | 1.9                   | 0                   | 75         |

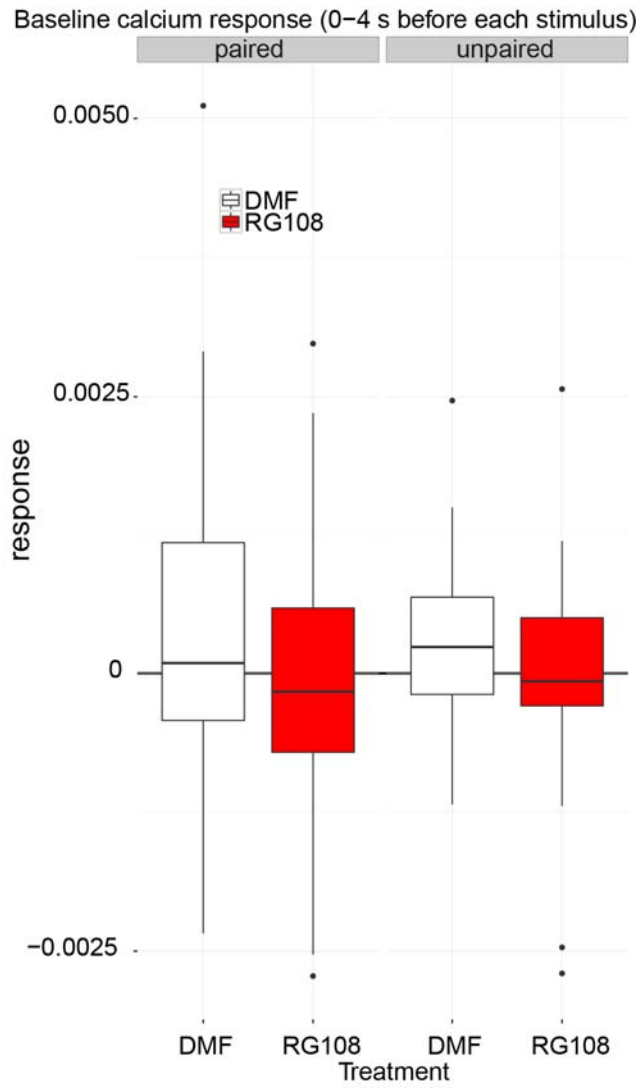

Figure S1 Baseline calcium responses measured during the first 4s before stimulus onset. Responses were pooled for each group and treatment across all measurements.
